# Supplementary material for: N-cyanoethyl polyethylenimine as a water-soluble binder for LiFePO4 cathode in lithium-ion batteries
Source: Springer Nature journal article supplement (doi:10.1007/s10853-018-2247-y), 2018-03-26
Supplement: MOESM1 [file 15568514]

**Support information**

**N-Cyanoethyl Polyethylenimine as a Water Soluble Binder for LiFePO4 Cathode in Lithium-Ion Batteries**

Jinxin Huanga,b, Jinglun Wanga, Haoxiang Zhonga, Lingzhi Zhanga,*

*a Key Laboratory of Renewable Energy, Guangdong Key Laboratory of New and Renewable Energy Research and Development, Guangzhou Institute of Energy Conversion, Chinese Academy of Sciences, Guangzhou, Guangdong 510640, China*

*b University of Chinese Academy of Sciences, Beijing 100049, China*

**Synthesis and characterization of CN-PEI**

**
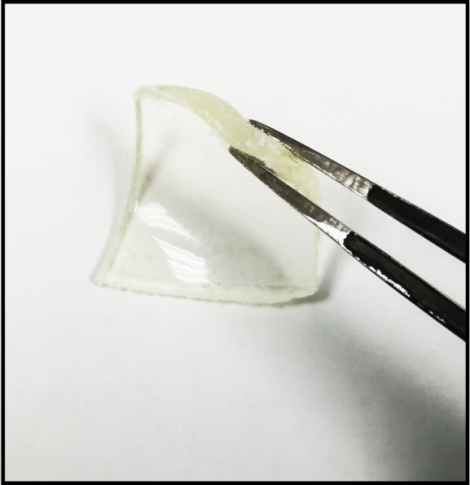
**

**Figure S1** Photo of flexible CN-PEI-7 polymer film.


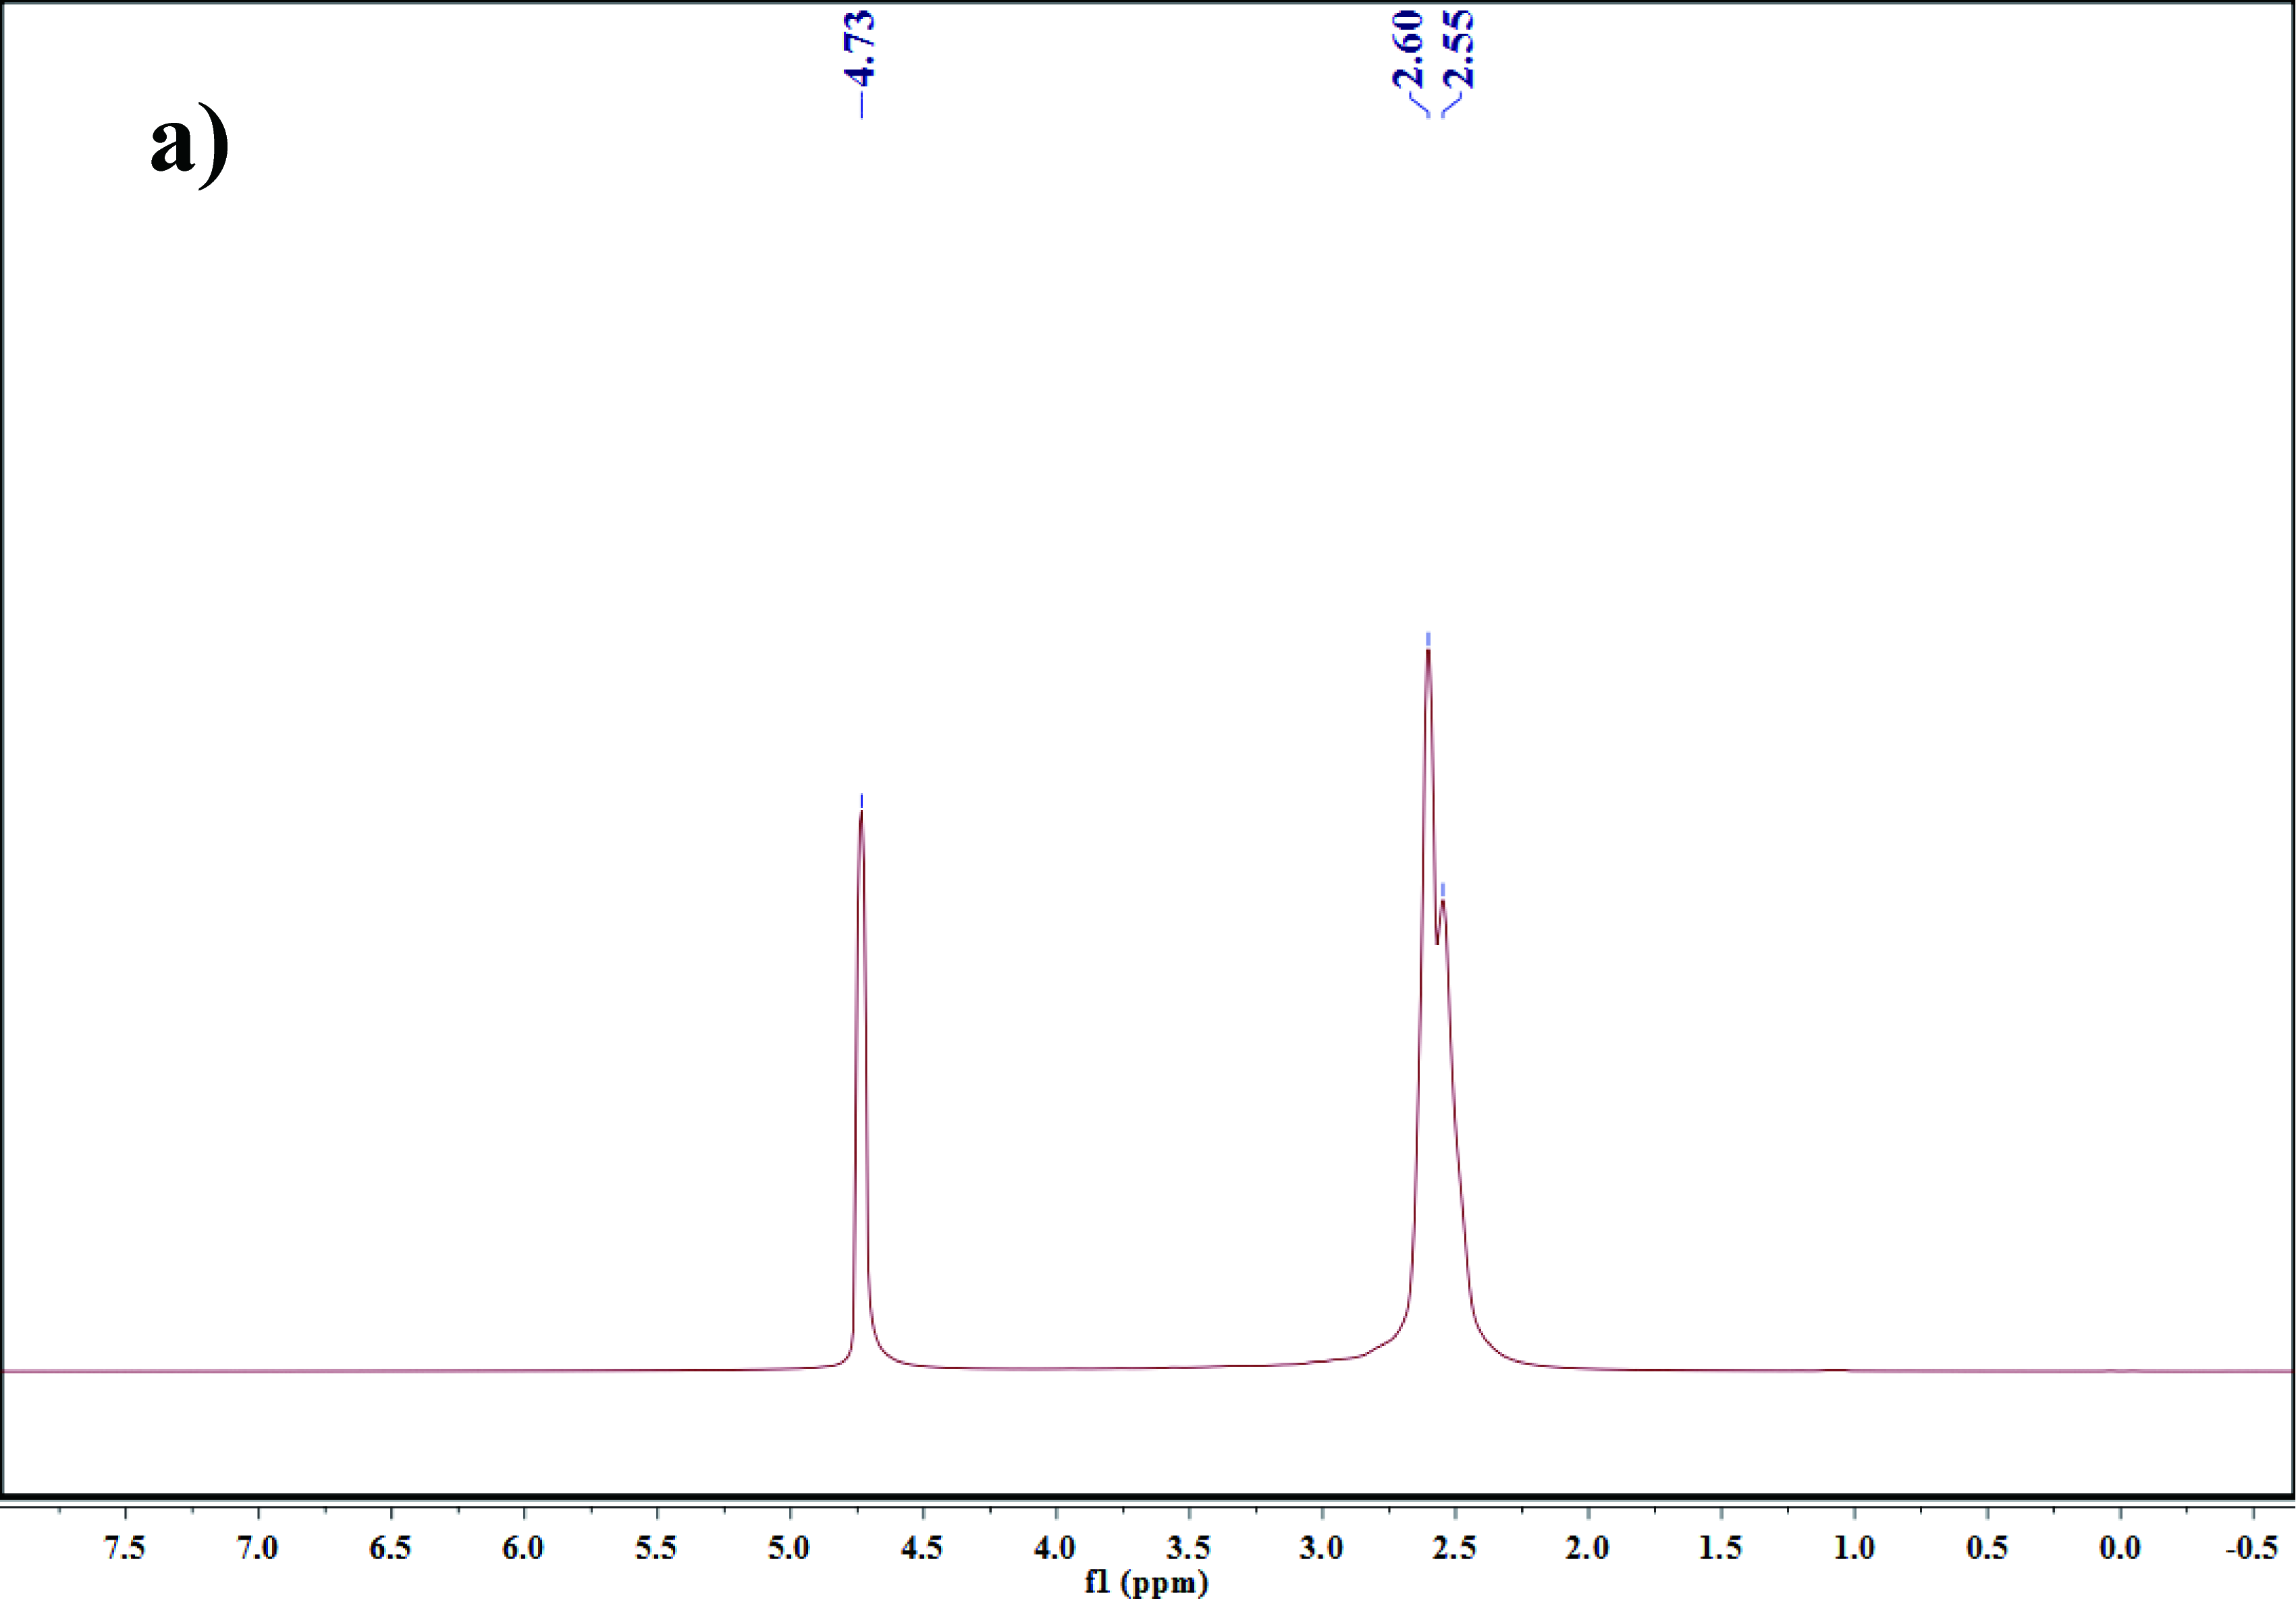


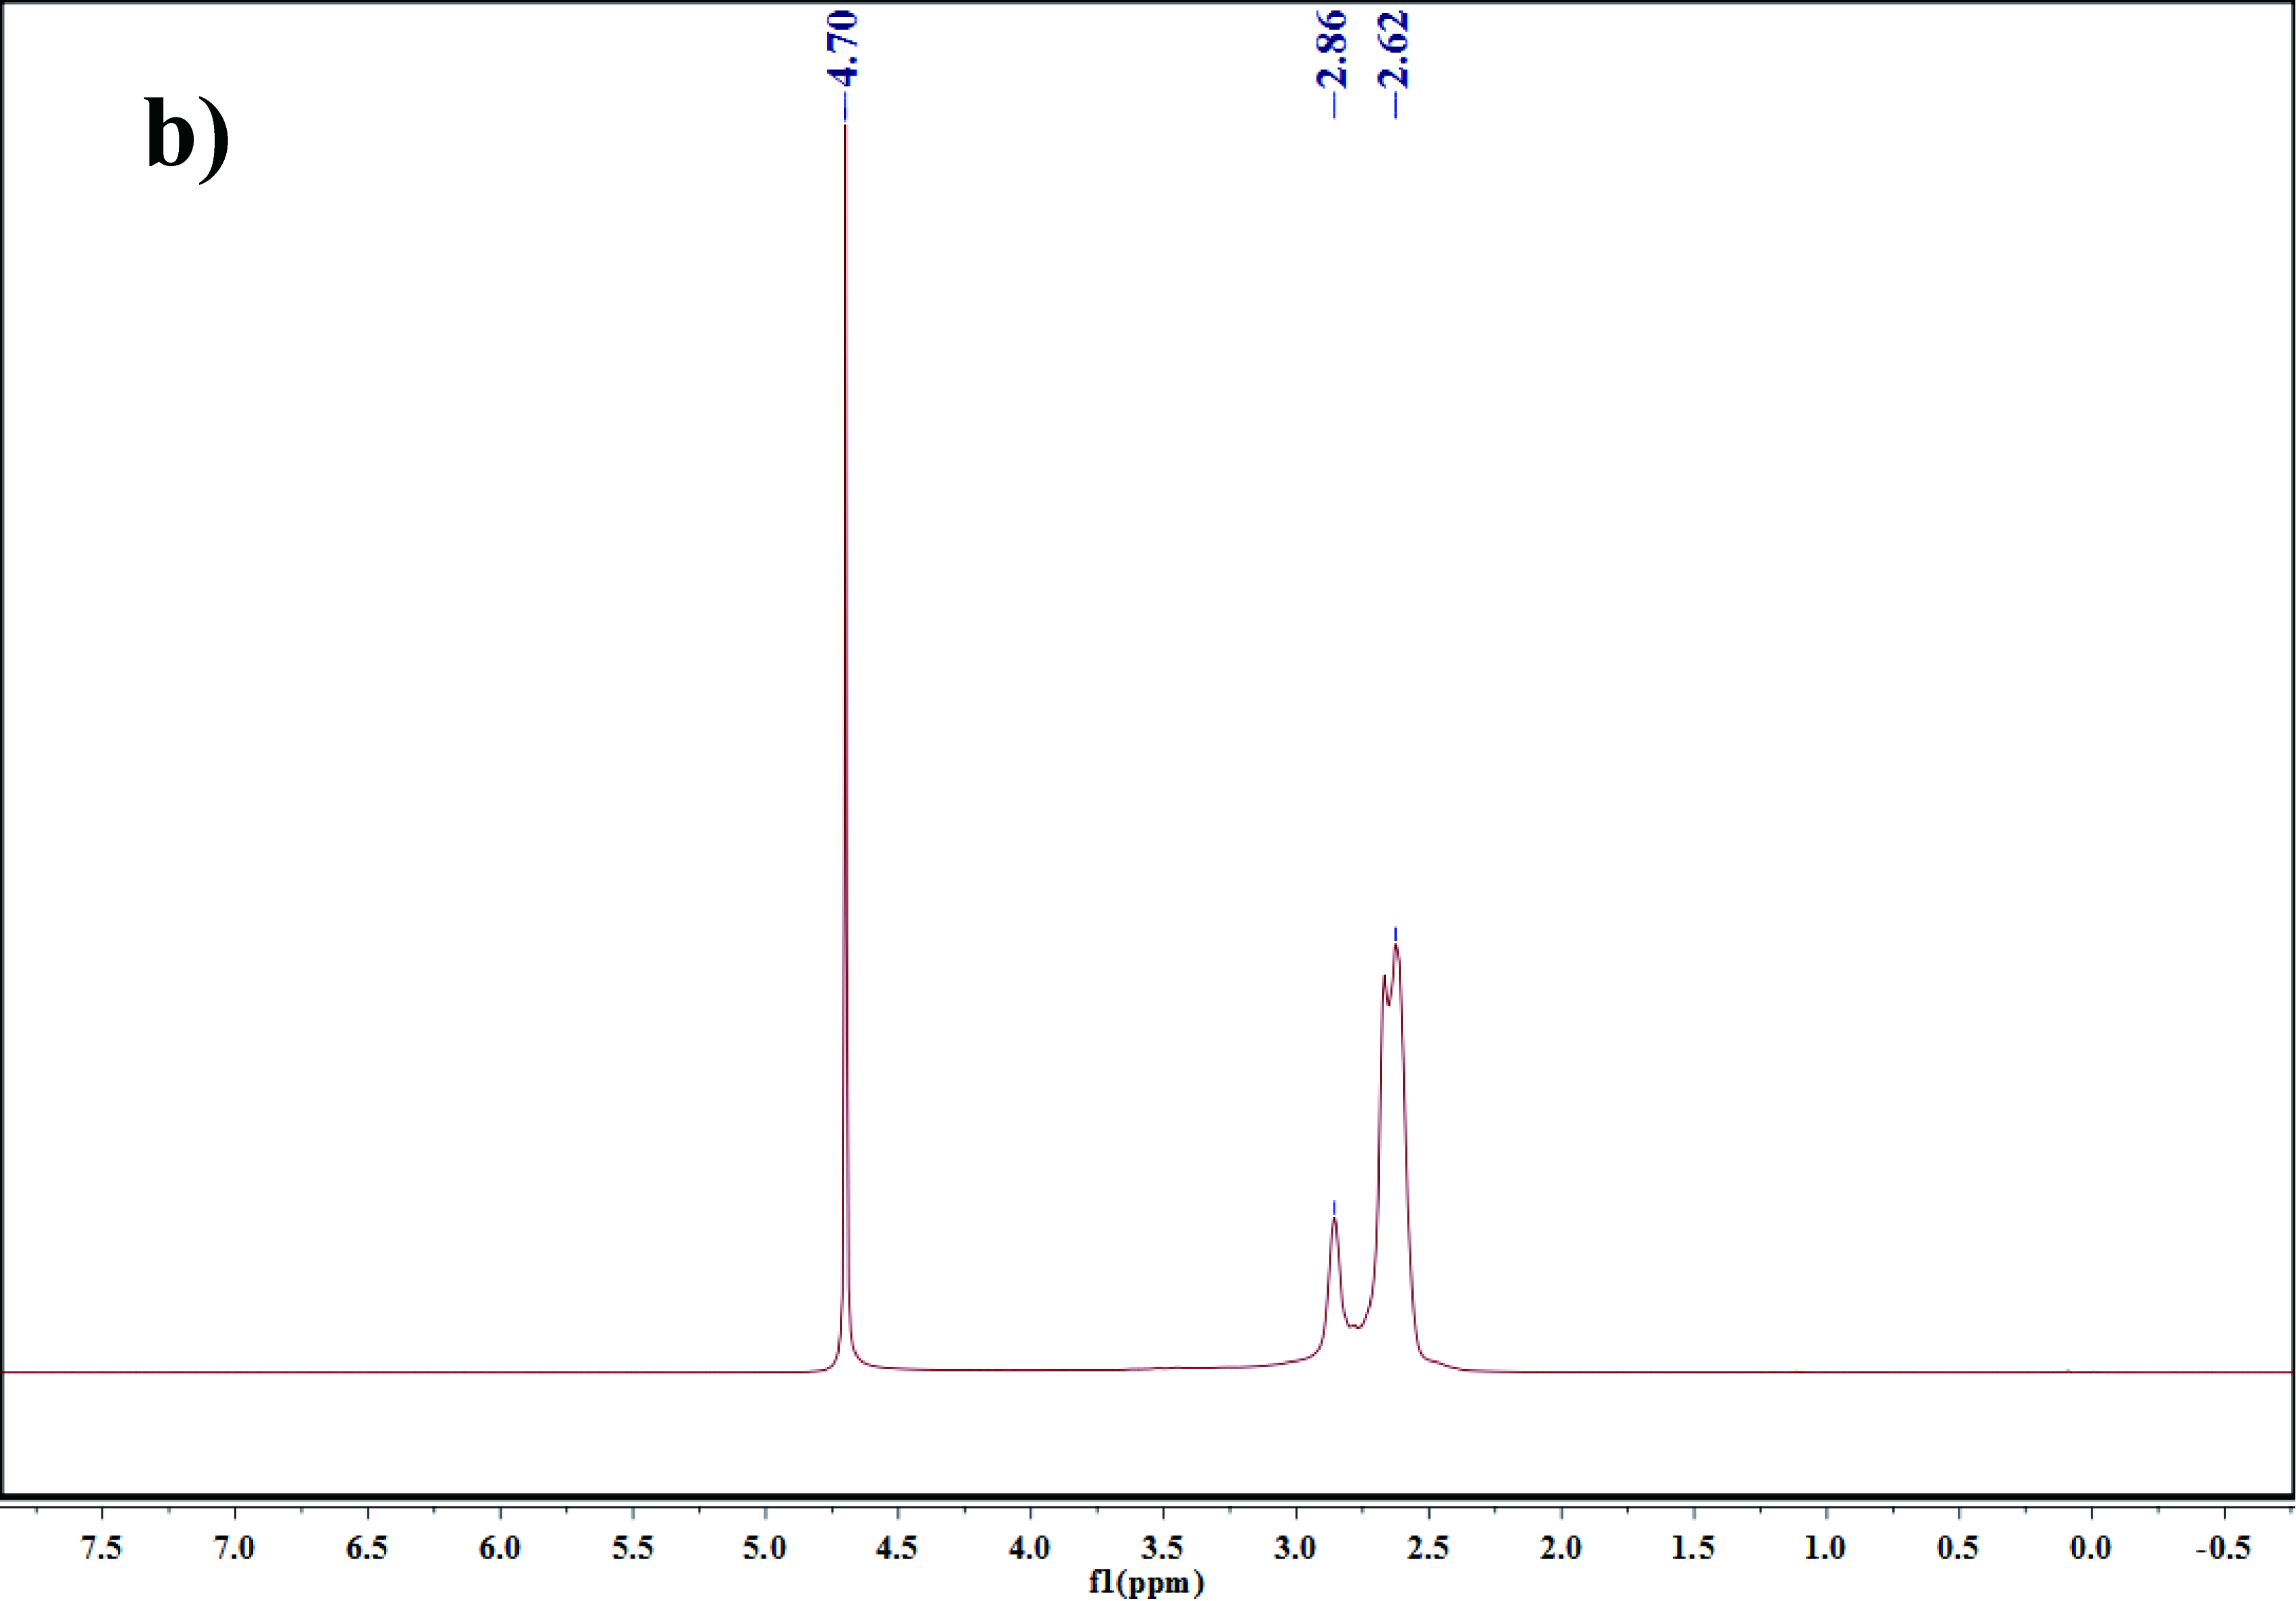


**Figure S2** 1H NMR spectra of PEI (a), CN-PEI-7 (b).

**Figure S3** The size distribution by volume of resultant CN-PEIs system, a: CN-PEI-6,

b: CN-PEI-7, c: CN-PEI-8.

**Electrochemical performance**

**Figure S4** The discharge curves at C/2 for the LFP electrode at the 1st cycle and 100th cycle with CN-PEI-7 (a), PVDF (b) or PEI (c) binder.

**Figure S5** The distribution of the agglomerate size for LFP slurry with PEI (a) and CN-PEI-7 (b). The schematic illustration of dispersion mechanism for LFP slurry with CN-PEI-7 or PEI (c).

**Table S1** Derived Re, Rct, Warburg Coefficient Values of LFP Electrode with CN-PEI-7, PVDF or PEI binder after the 3rd Cycles.

| Binder | Re (Ω) | Rct (Ω) | σw(Ω s-1/2) |
| --- | --- | --- | --- |
| CN-PEI-7 | 2.277 | 64.19 | 30.807 |
| PVDF | 1.907 | 142.6 | 36.046 |
| PEI | 2.26 | 200 | 42.5 |
